# Supplementary material for: Impact of the Dog–Human Bond on Canine Social Evaluation: Attachment Predicts Preference toward Prosocial Actors
Source: MDPI journal article supplement (doi:10.3390/ani13152480), 2023-08-01
Supplement: s1 [file s1]

**Table S1.** Demographic information for Part A (participants 1-37) and Part B (participants 1-26).

| Participant | Condition  | Breed                                                         | Age (Years) | Sex |
|-------------|------------|---------------------------------------------------------------|-------------|-----|
| 1           | Antisocial | Labrador Retriever / Springer Spaniel Mix                     | 2.25        | M   |
| 2           | Prosocial  | Golden Retriever                                              | 6.67        | M   |
| 3           | Control    | Yorkshire Terrier                                             | 5.17        | M   |
| 4           | Prosocial  | Terrier / Chihuahua / Australian Shepherd Mix                 | 3.08        | M   |
| 5           | Prosocial  | English Springer Spaniel                                      | 3.83        | M   |
| 6           | Prosocial  | Labrador Retriever                                            | 8.08        | M   |
| 7           | Prosocial  | Golden Retriever                                              | 10.67       | F   |
| 8           | Control    | Pug                                                           | 3.42        | F   |
| 9           | Antisocial | Golden Retriever                                              | 3.92        | M   |
| 10          | Prosocial  | Terrier Mix                                                   | 6.75        | M   |
| 11          | Prosocial  | Poodle Mix                                                    | 7.42        | M   |
| 12          | Control    | Labrador Retriever                                            | 5.33        | F   |
| 13          | Control    | Standard Poodle                                               | 7.33        | F   |
| 14          | Antisocial | Collie                                                        | 8.42        | M   |
| 15          | Prosocial  | Collie                                                        | 4.08        | M   |
| 16          | Antisocial | Chesapeake Bay Retriever                                      | 10.67       | F   |
| 17          | Control    | Vizsla / Shih-Tsu / Springer Spaniel Mix                      | 6.08        | M   |
| 18          | Antisocial | Miniature Schnauzer                                           | 3.92        | M   |
| 19          | Antisocial | Rottweiler Mix                                                | 7.08        | F   |
| 20          | Control    | Hound Mix                                                     | 5.17        | F   |
| 21          | Prosocial  | Norfolk Terrier Mix                                           | 5.50        | F   |
| 22          | Control    | Chihuahua / Dachshund Mix                                     | 3.58        | M   |
| 23          | Prosocial  | German Shepherd                                               | 3.67        | M   |
| 24          | Antisocial | Jack Russel Terrier / Basset Hound / Pembroke Welsh Corgi Mix | 1.00        | F   |
| 25          | Prosocial  | Labrador Retriever                                            | 12.58       | F   |
| 26          | Control    | Labrador Retriever Mix                                        | 6.92        | F   |
| 27          | Control    | Collie / Labrador Retriever / Irish Setter                    | 9.08        | F   |
| 28          | Control    | Miniature Schnauzer                                           | 3.50        | F   |
| 29          | Antisocial | Labrador Retriever Mix                                        | 5.75        | M   |
| 30          | Antisocial | Golden Retriever / Poodle Mix                                 | 4.92        | M   |
| 31          | Prosocial  | German Shepherd / Labrador Retriever Mix                      | 9.08        | M   |
| 32          | Prosocial  | Pembroke Welsh Corgi                                          | 3.33        | F   |
| 33          | Antisocial | Chihuahua / Pomeranian / Shih-Tzu Mix                         | 2.83        | F   |
| 34          | Control    | Jack Russell Terrier Mix                                      | 10.92       | M   |
| 35          | Antisocial | Cavalier King Charles Spaniel                                 | 3.25        | M   |
| 36          | Control    | Unknown Mix                                                   | 2.92        | F   |
| 37          | Antisocial | Vizsla                                                        | 1.92        | F   |

*Note: Breed was determined using owner-reports.*

**Table S2.** Descriptive statistics for average total looking time (seconds) per actor per condition

| Condition  | Mean (target) | Standard Deviation (target) | Mean (neutral) | Standard Deviation (neutral) |
|------------|---------------|-----------------------------|----------------|------------------------------|
| Prosocial  | 25.20         | 10.58                       | 8.02           | 9.48                         |
| Antisocial | 20.44         | 11.75                       | 6.23           | 3.94                         |
| Control    | 17.91         | 7.29                        | 7.86           | 6.51                         |

**Table S3.** Descriptive statistics for average response latency (seconds) per actor per condition

| Condition  | Mean (target) | Standard Deviation (target) | Mean (neutral) | Standard Deviation (neutral) |
|------------|---------------|-----------------------------|----------------|------------------------------|
| Prosocial  | 3.81          | 3.56                        | 0.67           | 0.91                         |
| Antisocial | 2.96          | 4.19                        | 2.38           | 1.80                         |
| Control    | 3.17          | 3.24                        | 2.04           | 1.92                         |

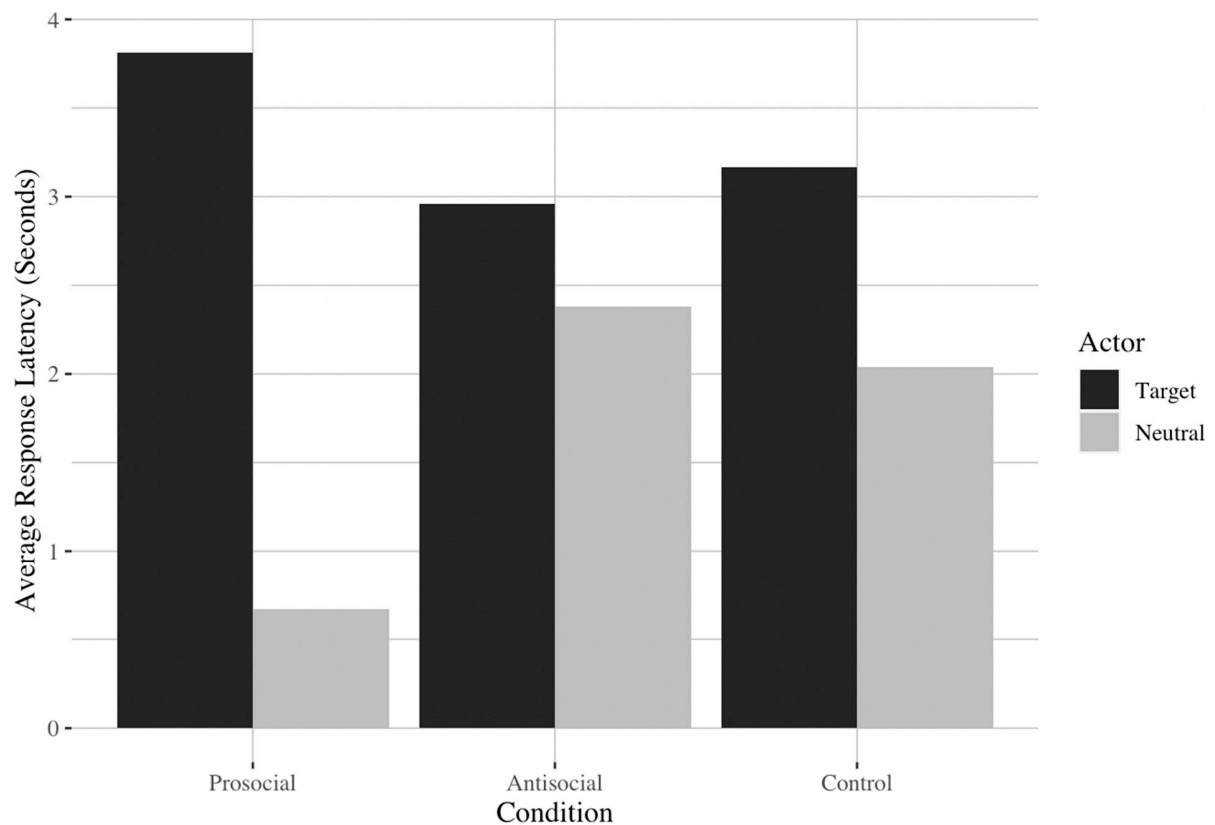

**Figure S1.** Dogs' average response latency in seconds by actor and condition. Notably, dogs were faster to choose to take a food reward from the neutral actor prosocial condition but not in antisocial or control conditions.
